# Supplementary material for: Modified surface states of NaGdF4:Yb3+/Tm3+ up-conversion nanoparticles via a post-chemical annealing process
Source: Royal Society of Chemistry journal article supplement (doi:10.1039/c8nr05021j), 2018-01-01
Supplement: c8nr05021j1.pdf [file c8nr05021j1.pdf]

# Modified Surface States of NaGdF<sub>4</sub>:Yb<sup>3+</sup>/Tm<sup>3+</sup> Up-conversion Nanoparticles via a Post-chemical Annealing Process

QiuHong Min<sup>a</sup>, Lei Zhao<sup>b</sup>, Yushuang Qi<sup>a</sup>, Jing Lei<sup>a</sup>, Wenbo Chen<sup>c</sup>, Xuhui Xu<sup>a</sup>, Dacheng Zhou<sup>a</sup>, Jianbei Qiu<sup>a,\*</sup> and

Xue Yu<sup>a,\*</sup>

<sup>a</sup> Faculty of Materials Science and Engineering, Kunming University of Science and Technology, Kunming, 650093, China

<sup>b</sup> School of Physics and Opto-Electronic Technology, Baoji University of Arts and Sciences, Baoji, 721016, China

<sup>c</sup> Engineering Research Center of New Energy Storage Devices and Applications, Chongqing University of Arts and Sciences, Chongqing, 402160, China

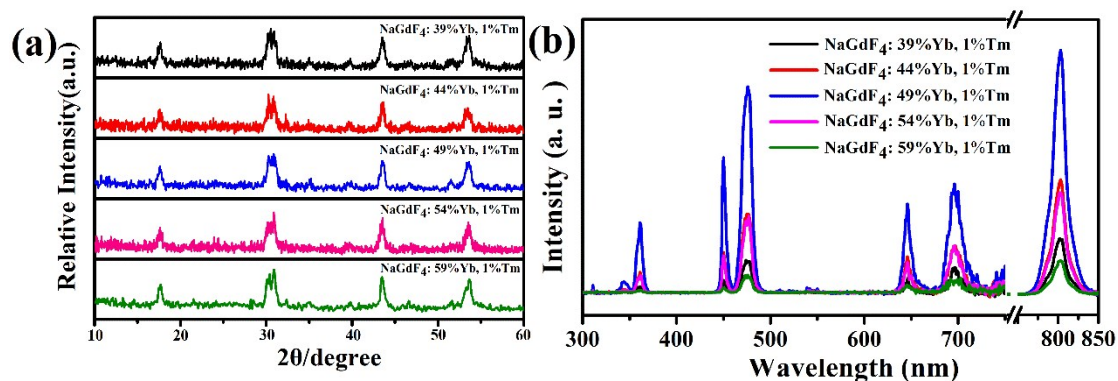

Fig. S1 (a) XRD patterns of NaGdF<sub>4</sub>: x%Yb<sup>3+</sup>, 1%Tm<sup>3+</sup> NPs, (b) the up-conversion spectra of NaGdF<sub>4</sub>: x%Yb<sup>3+</sup>, 1%Tm<sup>3+</sup> NPs under the excitation of 980 nm laser (x = 0.39, 0.44, 0.49, 0.54 and 0.59).

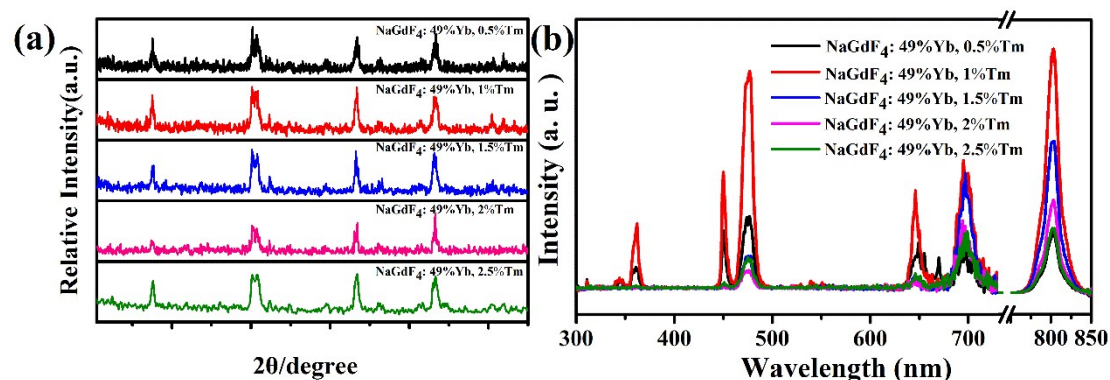

Fig. S2 (a) XRD patterns of NaGdF<sub>4</sub>: 49%Yb<sup>3+</sup>, y%Tm<sup>3+</sup> NPs, (b) the up-conversion spectra of NaGdF<sub>4</sub>: 49%Yb<sup>3+</sup>, y%Tm<sup>3+</sup> NPs under the excitation of 980 nm laser (y = 0.005, 0.01, 0.015, 0.02 and 0.025).

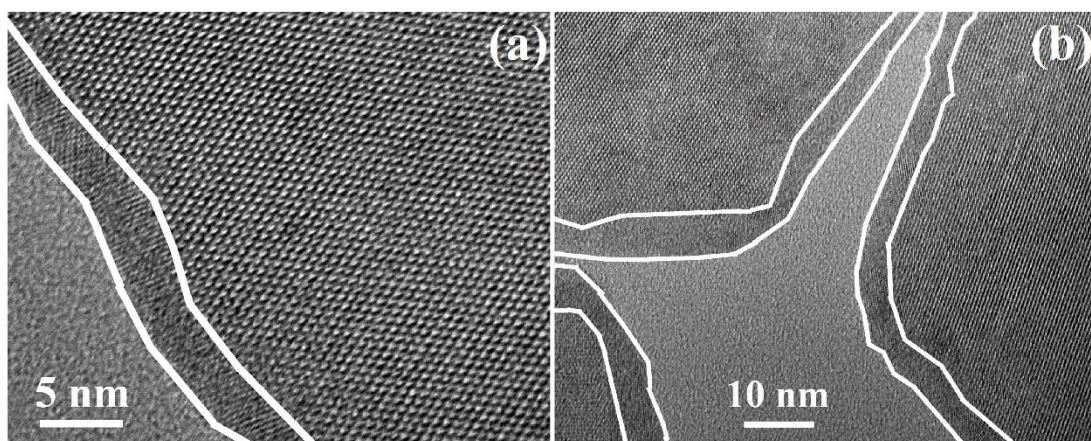

Fig. S3 The HRTEM images of NaGdF<sub>4</sub> bare core NPs.

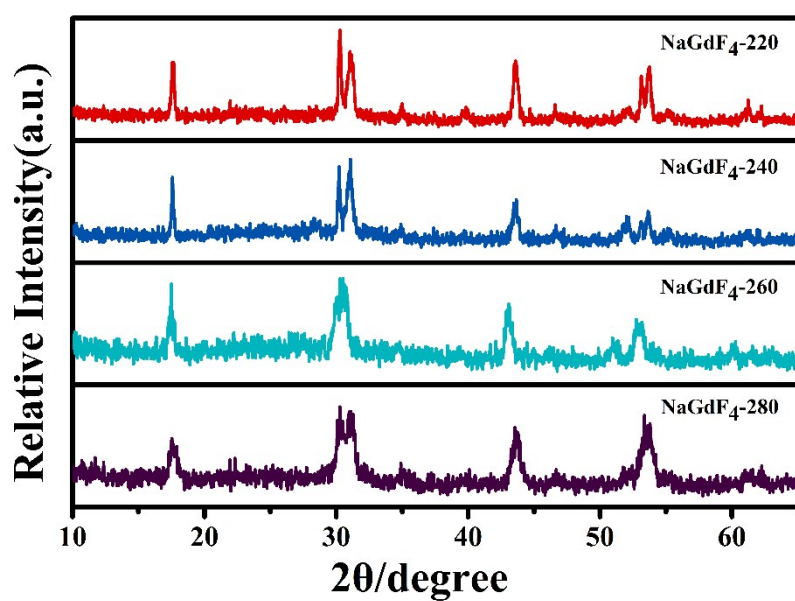

Fig. S4 XRD patterns of the post-chemical annealed NaGdF<sub>4</sub>: 49%Yb<sup>3+</sup>, 1%Tm<sup>3+</sup> NPs at different temperature (T=220, 240, 260, 280°C).

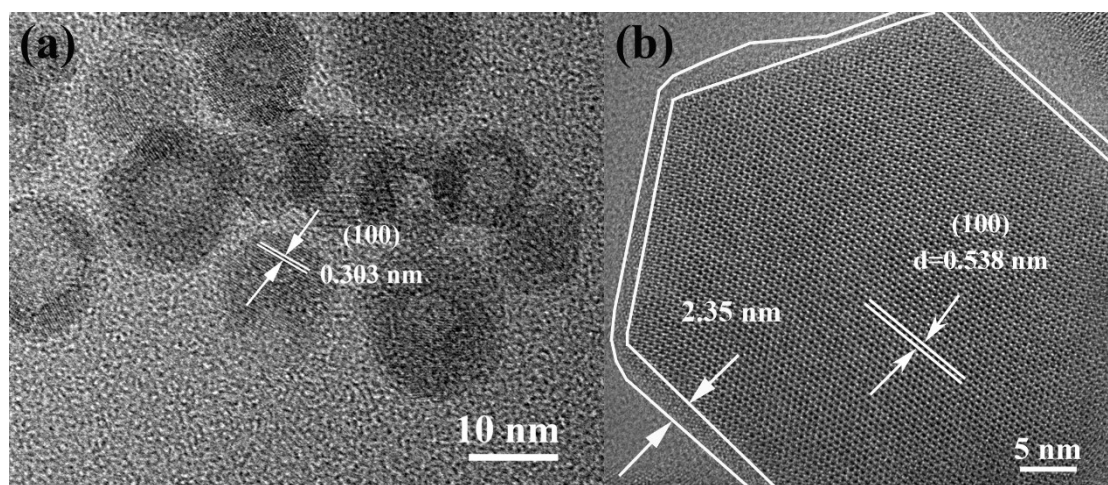

Fig. S5 The HRTEM images of 17-nm (a) and 55-nm (b) NPs after the post-chemical annealing at 200°C.

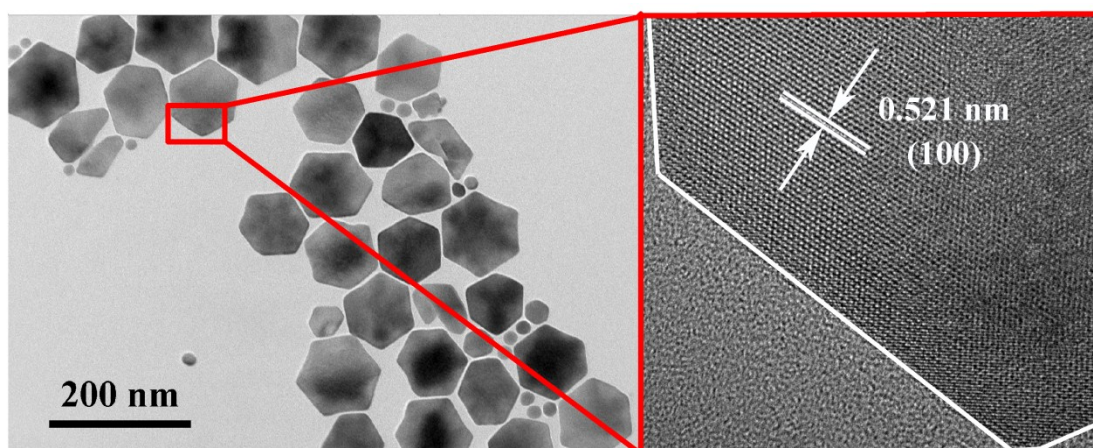

Fig. S6 The TEM (left) and HRTEM (right) images of NaGdF<sub>4</sub>-260 NPs

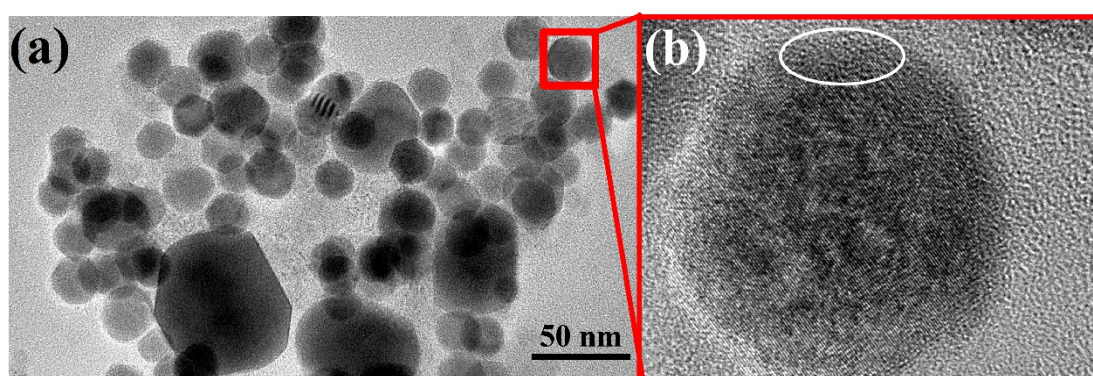

Fig. S7 The TEM (left) and HRTEM (right) images of NaGdF<sub>4</sub>-280 NPs.

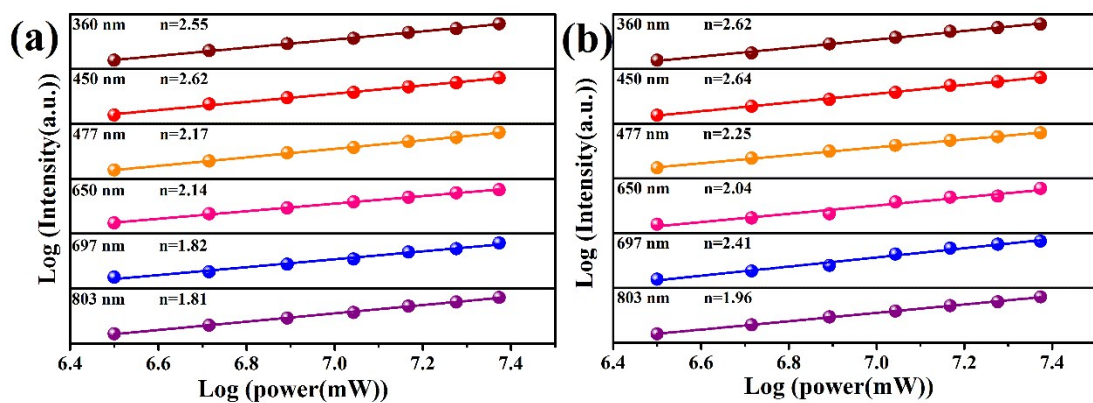

Fig. S8 The logarithmic relationship of Tm<sup>3+</sup> emission intensities versus power density of NaGdF<sub>4</sub> bare core NPs (a) and NaGdF<sub>4</sub>-250 NPs (b).

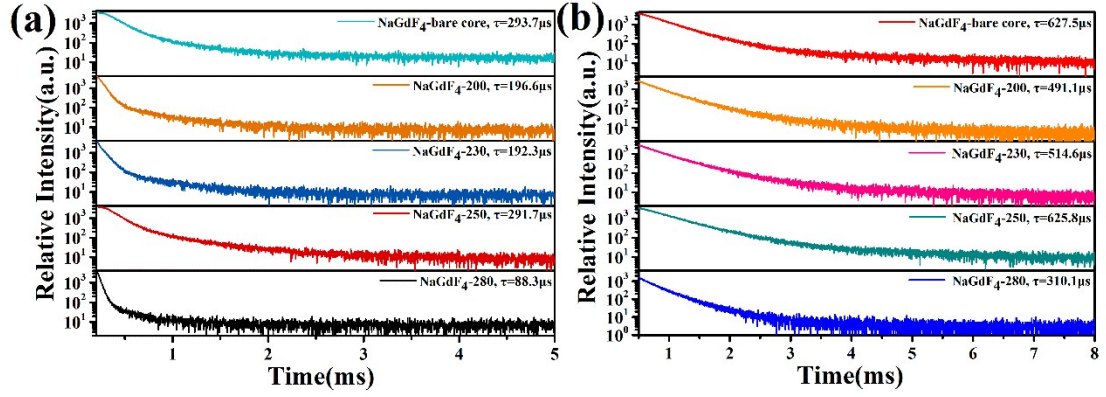

Fig. S9 The fluorescence decay curves of (a) <sup>3</sup>F<sub>2,3</sub> and (b) <sup>3</sup>H<sub>4</sub> level in NaGdF<sub>4</sub> bare core NPs and the post-annealed NPs. (the annealing temperature is 200, 230, 250 and 280 °C, respectively.)

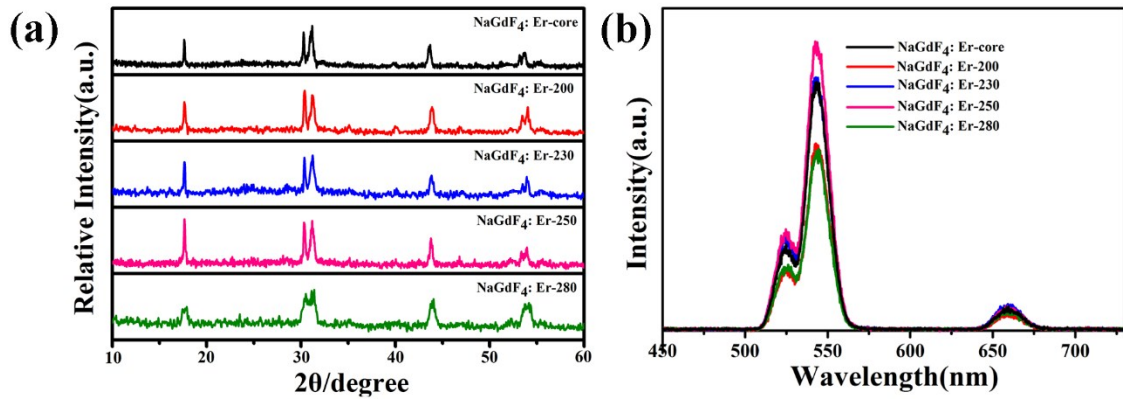

Fig. S10 (a) XRD patterns of NaGdF<sub>4</sub>:Er<sup>3+</sup> bare core NPs and the post-annealed NP; (b) The up-conversion spectra of NaGdF<sub>4</sub>:Er<sup>3+</sup> bare core NPs and post-annealed NPs under the excitation of 980 nm (the post-chemical annealing temperature is 200, 230, 250 and 280 °C, respectively.).

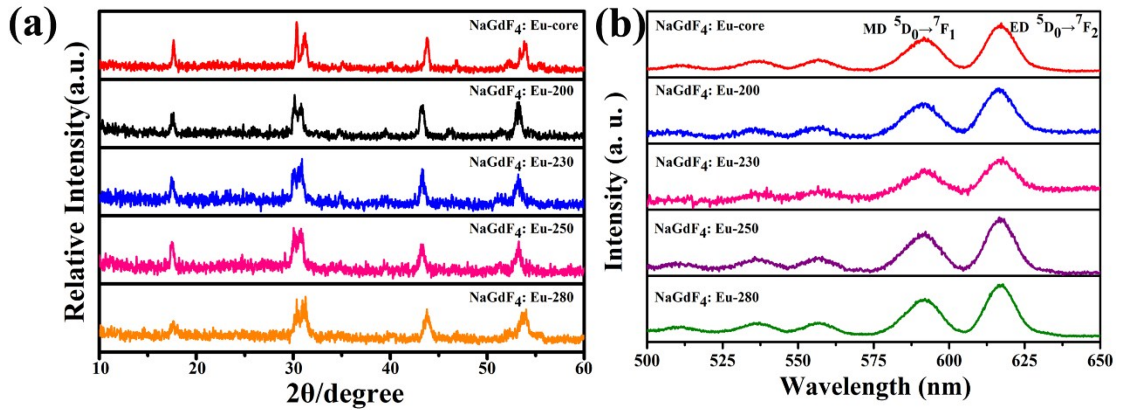

Fig. S11 (a) XRD patterns of NaGdF<sub>4</sub>:Eu<sup>3+</sup> bare core NPs and the post-chemical annealed NPs; (b) The down-conversion spectra of NaGdF<sub>4</sub>:Eu<sup>3+</sup> bare core and post-annealed NPs under the excitation of 393 nm (the post-chemical annealing temperature is 200, 230, 250 and 280 °C, respectively.).

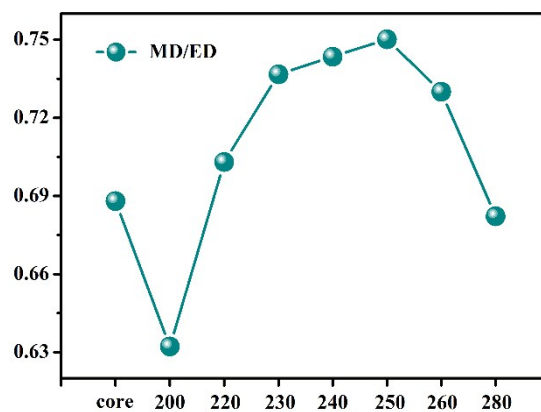

Fig. S12 The intensity ratio of MD/ED of  $\text{Eu}^{3+}$  as a function of the post-chemical annealing temperature ( $T=200, 220, 230, 240, 250, 260, 280^\circ\text{C}$ )

**Table 1.** The color coordinates of  $\text{NaGdF}_4$  bare core NPs and  $\text{NaGdF}_4$ -250 NPs

| Pulse-width( $\mu\text{s}$ ) | Bare Core        | $\text{NaGdF}_4$ -250 |
|------------------------------|------------------|-----------------------|
| 50                           | (0.4366, 0.3931) | (0.4234, 0.4009)      |
| 100                          | (0.4263, 0.3889) | (0.4071, 0.3914)      |
| 200                          | (0.4211, 0.3747) | (0.3617, 0.3499)      |
| 300                          | (0.4155, 0.3672) | (0.3233, 0.3186)      |
| 400                          | (0.4045, 0.3580) | (0.2951, 0.2938)      |
| 500                          | (0.3926, 0.3488) | (0.2805, 0.2773)      |
| 600                          | (0.3859, 0.3406) | (0.2660, 0.2595)      |
| 700                          | (0.3758, 0.3324) | (0.2540, 0.2495)      |
| 800                          | (0.3659, 0.3264) | (0.2437, 0.2384)      |
| 900                          | (0.3574, 0.3189) | (0.2401, 0.2335)      |
| 1000                         | (0.3533, 0.3163) | (0.2340, 0.2270)      |
